# Supplementary material
Source: Royal Society of Chemistry journal article supplement (doi:10.1039/d6qm00224b)
Supplement: d6qm00224b1.pdf [file d6qm00224b1.pdf]

## Supporting Information

# Novel Donor-Acceptor Structured Ionic Organic Framework/Porous Carbon Nitride for Efficient Photocatalysis Imine Synthesis

*Huicai Zheng, Yun Zhu, Qingqing Pan, Liang Zhou, Jiaxin Yang and Limei Zhou\*, and Li Qin\**

Precise Synthesis and Function Development Key Laboratory of Sichuan Province, China West Normal University,

Sichuan, Nanchong 637002, China.

## Contents

|                                                                                                                                                                      |          |
|----------------------------------------------------------------------------------------------------------------------------------------------------------------------|----------|
| <b>Section S1. Supplementary Figures and Tables .....</b>                                                                                                            | <b>1</b> |
| Section S1.1 SEM of other proportion catalysts.....                                                                                                                  | 1        |
| Section S1.2 N <sub>2</sub> adsorption isotherms and pore size distribution .....                                                                                    | 1        |
| Section S1.3 XPS survey spectra of IOF, PCN and IOF <sub>5</sub> /PCN <sub>5</sub> .....                                                                             | 2        |
| Section S1.4 The E <sub>g</sub> , E <sub>VB</sub> and E <sub>CB</sub> of IOF, PCN and IOF <sub>5</sub> /PCN <sub>5</sub> .....                                       | 2        |
| Section S1.5 schematic diagram of the band structure of IOF, PCN and IOF <sub>5</sub> /PCN <sub>5</sub> .....                                                        | 2        |
| Section S1.6 Comparison of catalytic performance between IOF <sub>5</sub> /PCN <sub>5</sub> and previously reported<br>benzylamine coupling reaction materials ..... | 3        |
| Section S1.7 H <sub>2</sub> O <sub>2</sub> production of IOF, PCN and IOF <sub>5</sub> /PCN <sub>5</sub> .....                                                       | 3        |
| <b>Section S2. Theoretical calculations .....</b>                                                                                                                    | <b>4</b> |
| <b>Section S3. <sup>1</sup>H NMR and <sup>13</sup>C NMR.....</b>                                                                                                     | <b>5</b> |
| Section S3.1 <sup>1</sup> H NMR, <sup>13</sup> C NMR of BIBP .....                                                                                                   | 5        |
| Section S3.2 <sup>1</sup> H NMR, <sup>13</sup> C NMR of [Be <sub>2</sub> A][H] .....                                                                                 | 6        |
| Section S3.4 <sup>1</sup> H NMR, <sup>13</sup> C NMR of [Be <sub>2</sub> A][Cl].....                                                                                 | 9        |
| Section S3.5 <sup>1</sup> H NMR, <sup>13</sup> C NMR of [Th <sub>2</sub> A][H] .....                                                                                 | 11       |

## Section S1. Supplementary Figures and Tables

### Section S1.1 SEM of other proportion catalysts

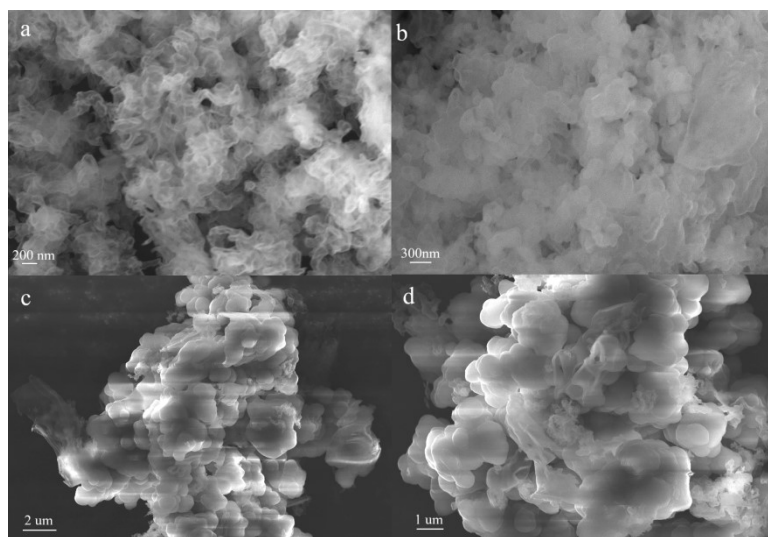

Figure S1 SEM images of IOF<sub>5</sub>/PCN<sub>9</sub> (a), IOF<sub>3</sub>/PCN<sub>7</sub> (b), IOF<sub>7</sub>/PCN<sub>3</sub> (c) and IOF<sub>9</sub>/PCN<sub>1</sub> (d).

### Section S1.2 N<sub>2</sub> adsorption isotherms and pore size distribution

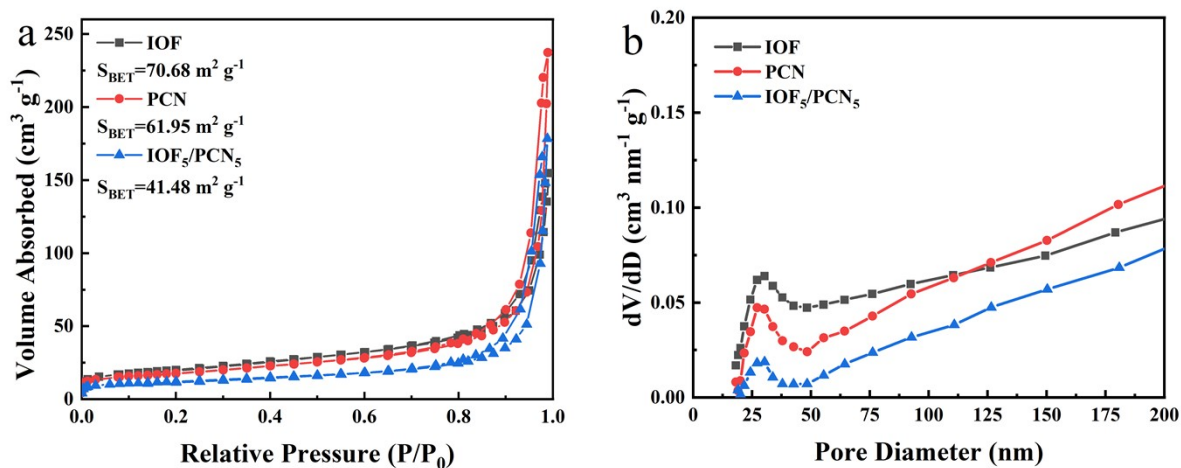

Figure S2 N<sub>2</sub> sorption isotherms(a) of IOF, PCN and IOF<sub>5</sub>/PCN<sub>5</sub>, and pore diameter distribution map (b) of IOF, PCN, IOF<sub>5</sub>/PCN<sub>5</sub>

**Section S1.3** XPS survey spectra of IOF, PCN and IOF<sub>5</sub>/PCN<sub>5</sub>

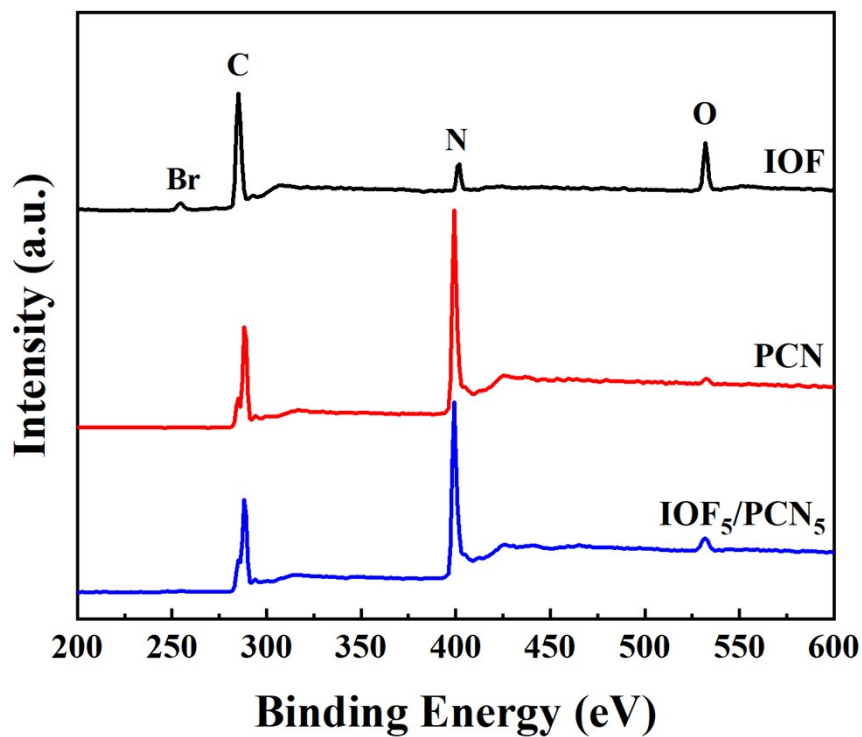

**Figure S3** XPS survey spectra of IOF, PCN and IOF<sub>5</sub>/PCN<sub>5</sub>

**Section S1.4** The  $E_g$ ,  $E_{VB}$  and  $E_{CB}$  of IOF, PCN and IOF<sub>5</sub>/PCN<sub>5</sub>

**Table S1** The  $E_g$ ,  $E_{VB}$  and  $E_{CB}$  of IOF, PCN and IOF<sub>5</sub>/PCN<sub>5</sub>

| Entry | Samples                            | $E_g$ (eV) | $E_{VB}$ a (eV) | $E_{CB}$ (eV) |
|-------|------------------------------------|------------|-----------------|---------------|
| 1     | IOF                                | 3.25       | 1.86            | -1.39         |
| 2     | PCN                                | 2.9        | 1.66            | -1.25         |
| 3     | IOF <sub>5</sub> /PCN <sub>5</sub> | 2.9        | 1.84            | -1.06         |

**Section S1.5** schematic diagram of the band structure of IOF, PCN and IOF<sub>5</sub>/PCN<sub>5</sub>

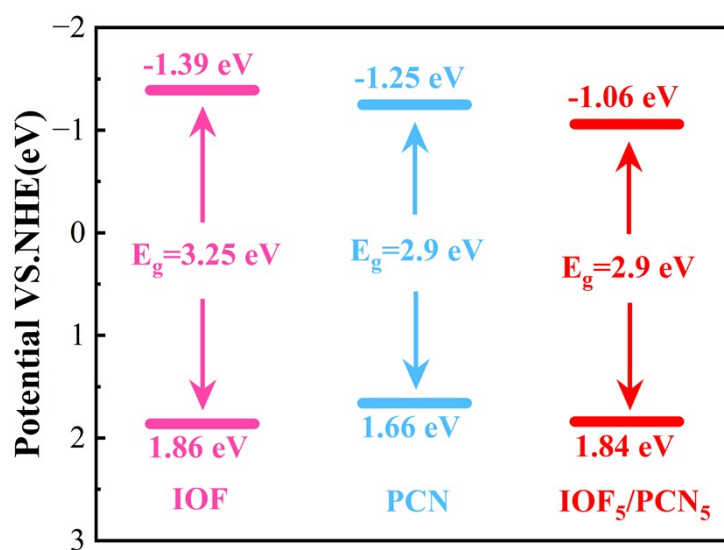

**Figure S4** schematic diagram of the band structure of IOF, PCN and IOF<sub>5</sub>/PCN<sub>5</sub>

**Section S1.6** Comparison of catalytic performance between IOF<sub>5</sub>/PCN<sub>5</sub> and previously reported benzylamine coupling reaction materials

**Table S2** Comparison of catalytic performance between IOF<sub>5</sub>/PCN<sub>5</sub> and previously reported benzylamine coupling reaction materials

| Entry          | catalyst                            | Catalyst amount (mg) | Time (h) | Light                 | Conv. (%) | Sel. (%) |
|----------------|-------------------------------------|----------------------|----------|-----------------------|-----------|----------|
| 1 <sup>1</sup> | CeR/g-C <sub>3</sub> N <sub>4</sub> | 50 mg                | 3 h      | 300 W Xe lamp         | 82        | 99       |
| 2 <sup>2</sup> | NiTiFe-LDH                          | 15 mg                | 26 h     | Blue LED              | 95        | 93       |
| 3 <sup>3</sup> | Cd-MOFs                             | 10 mg                | 6 h      | 300 W Xe lamp         | 98        | 99       |
| 4 <sup>4</sup> | HNU-64                              | 10 mg                | 7 h      | 300W Xe lamp (>400nm) | 93        | 99       |
| 5 <sup>5</sup> | CIBD-BTT                            | 10 mg                | 6 h      | 300 W Xe LAMP         | 82        | 99       |
| 6              | IOF <sub>5</sub> /PCN <sub>5</sub>  | 10 mg                | 6 h      | 300 W Xe lamp         | 98        | 99       |

## Section S1.7 H<sub>2</sub>O<sub>2</sub> production of IOF, PCN and IOF<sub>5</sub>/PCN<sub>5</sub>

**Table S3** H<sub>2</sub>O<sub>2</sub> production of IOF, PCN and IOF<sub>5</sub>/PCN<sub>5</sub>

| catalyst                           | H <sub>2</sub> O <sub>2</sub> yield(umol/g/h) |
|------------------------------------|-----------------------------------------------|
| PCN                                | 131.25                                        |
| IOF                                | 135.28                                        |
| IOF <sub>5</sub> /PCN <sub>5</sub> | 282.45                                        |

**Reaction conditions:** catalyst (10 mg) in deionized water (50 mL), purged with O<sub>2</sub> and stirred for 30 min in the dark (to achieve dissolved oxygen saturation), followed by irradiation with a xenon lamp for 2 h. The generated H<sub>2</sub>O<sub>2</sub> was determined by iodometric titration.

## Section S2.Theoretical calculations

Gaussian 09, Revision C.01, M. J. Frisch, G. W. Trucks, H. B. Schlegel, G. E. Scuseria, M. A. Robb, J. R. Cheeseman, G. Scalmani, V. Barone, B. Mennucci, G. A. Petersson, H. Nakatsuji, M. Caricato, X. Li, H. P. Hratchian, A. F. Izmaylov, J. Bloino, G. Zheng, J. L. Sonnenberg, M. Hada, M. Ehara, K. Toyota, R. Fukuda, J. Hasegawa, M. Ishida, T. Nakajima, Y. Honda, O. Kitao, H. Nakai, T. Vreven, J. A. Montgomery, Jr., J. E. Peralta, F. Ogliaro, M. Bearpark, J. J. Heyd, E. Brothers, K. N. Kudin, V. N. Staroverov, T. Keith, R. Kobayashi, J. Normand, K. Raghavachari, A. Rendell, J. C. Burant, S. S. Iyengar, J. Tomasi, M. Cossi, N. Rega, J. M. Millam, M. Klene, J. E. Knox, J. B. Cross, V. Bakken, C. Adamo, J. Jaramillo, R. Gomperts, R. E. Stratmann, O. Yazyev, A. J. Austin, R. Cammi, C. Pomelli, J. W. Ochterski, R. L. Martin, K. Morokuma, V. G. Zakrzewski, G. A. Voth, P. Salvador, J. J. Dannenberg, S. Dapprich, A. D. Daniels, O. Farkas, J. B. Foresman, J. V. Ortiz, J. Cioslowski, and D. J. Fox, Gaussian, Inc., Wallingford CT, 2010.

### Section S3. $^1\text{H}$ NMR and $^{13}\text{C}$ NMR

#### Section S3.1 $^1\text{H}$ NMR, $^{13}\text{C}$ NMR of BIBP

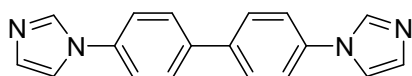

**BIBP(4,4'-di(1H-imidazol-1-yl)-1,1'-biphenyl)** :  $^1\text{H}$  NMR (400

MHz, DMSO-*d*<sub>6</sub>):  $\delta$  8.41 (s, 2H), 7.95 (d, *J*=8.0 Hz, 4H), 7.89 (s, 2H), 7.84 (d, *J*=8.0 Hz, 4H), 7.20 (s, 2H).

$^{13}\text{C}$  NMR (100 MHz, DMSO-*d*<sub>6</sub>):  $\delta$  137.8, 136.8, 136.0, 130.5, 128.4, 121.2, 118.4.

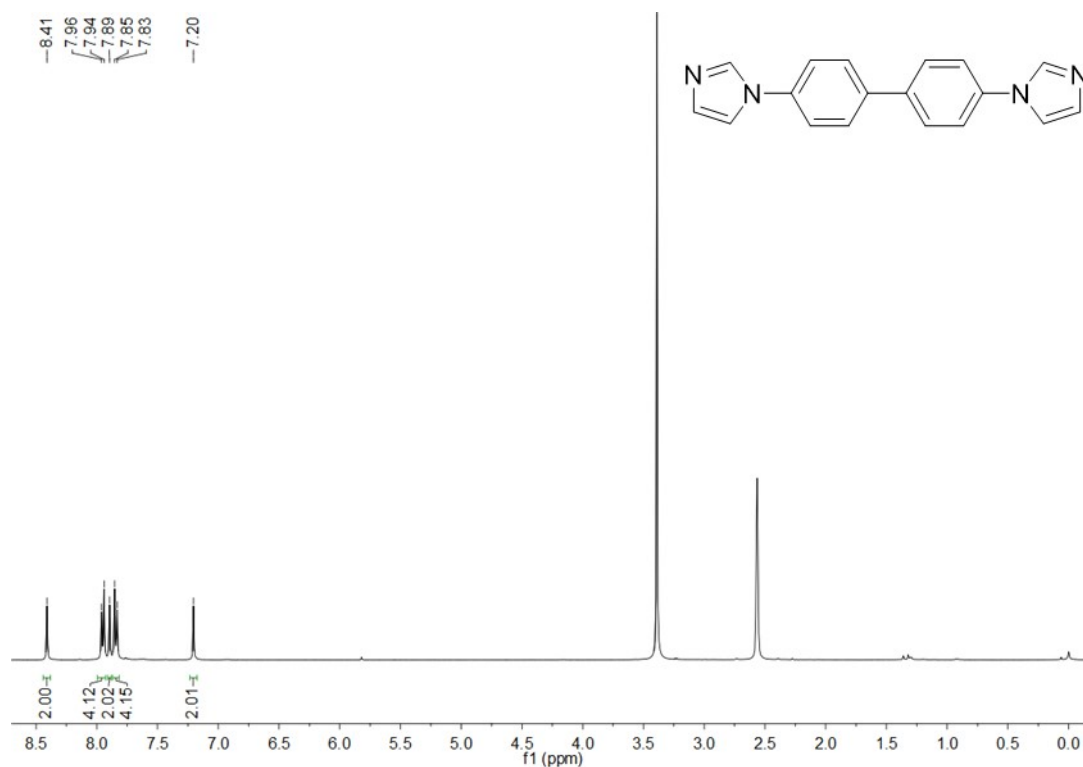

**Figure S3.1**  $^1\text{H}$  NMR of spectra of BIBP

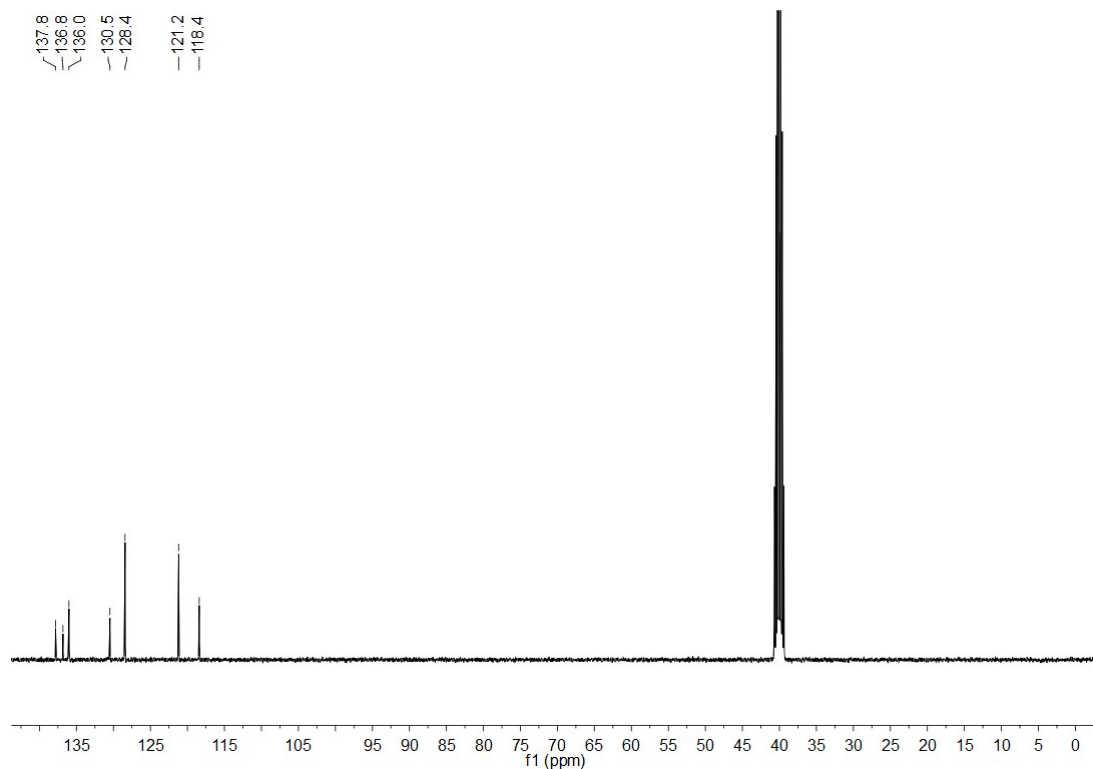

**Figure S3.2**  $^{13}\text{C}$  NMR of spectra of BIBP

**Section S3.2**  $^1\text{H}$  NMR,  $^{13}\text{C}$  NMR of  $[\text{Be}_2\text{A}][\text{H}]$

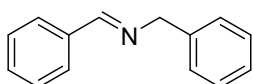

**$[\text{Be}_2\text{A}][\text{H}]((\text{E})\text{-N-benzyl-1-phenylmethanimine})$ :  $^1\text{H}$  NMR (400 MHz, DMSO-**

*d6*):  $\delta$  8.51 (s, 1H), 7.78 (dd,  $J_1=4.0$  Hz,  $J_2=8.0$  Hz, 2H), 7.46 (dd,  $J_1=1.6$  Hz,  $J_2=5.2$  Hz, 4H), 7.34 (t,  $J=4.0$  Hz, 4H), 4.78 (s, 2H).  $^{13}\text{C}$  NMR (100 MHz, DMSO-*d6*):  $\delta$  162.3, 140.1, 136.5, 131.2, 129.2, 128.8, 128.4, 128.4, 127.3, 64.4.

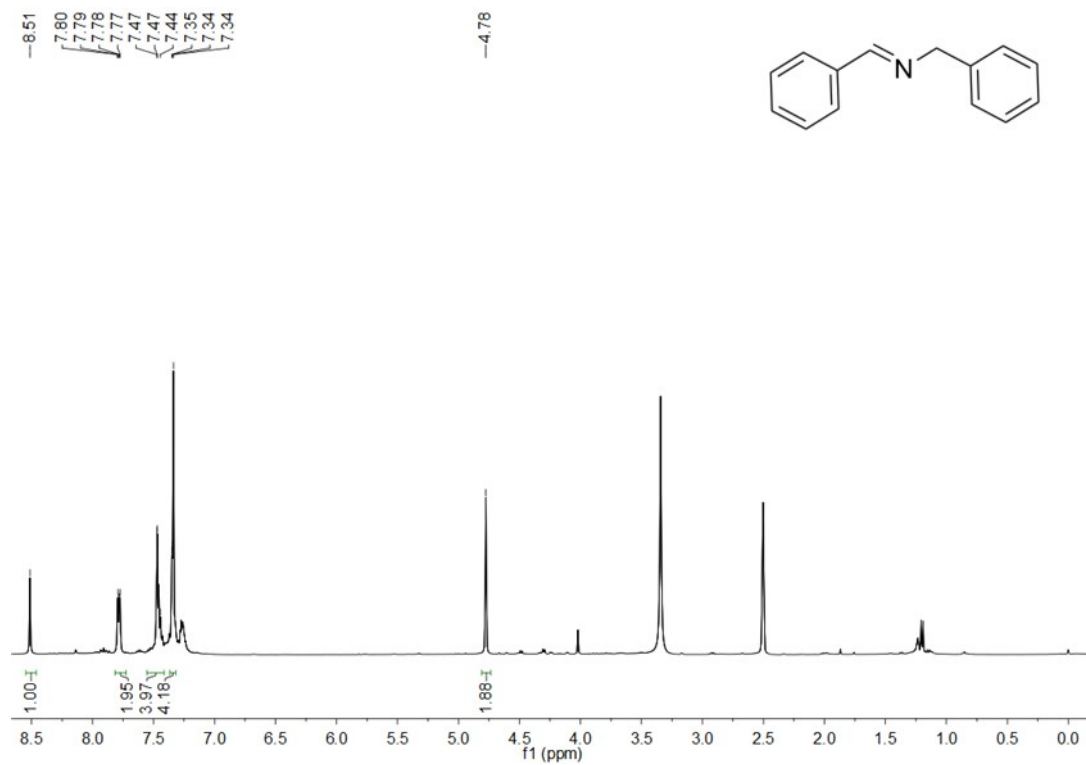

Figure S3.3  $^1\text{H}$  NMR of spectra of  $[\text{Be}_2\text{A}][\text{H}]$

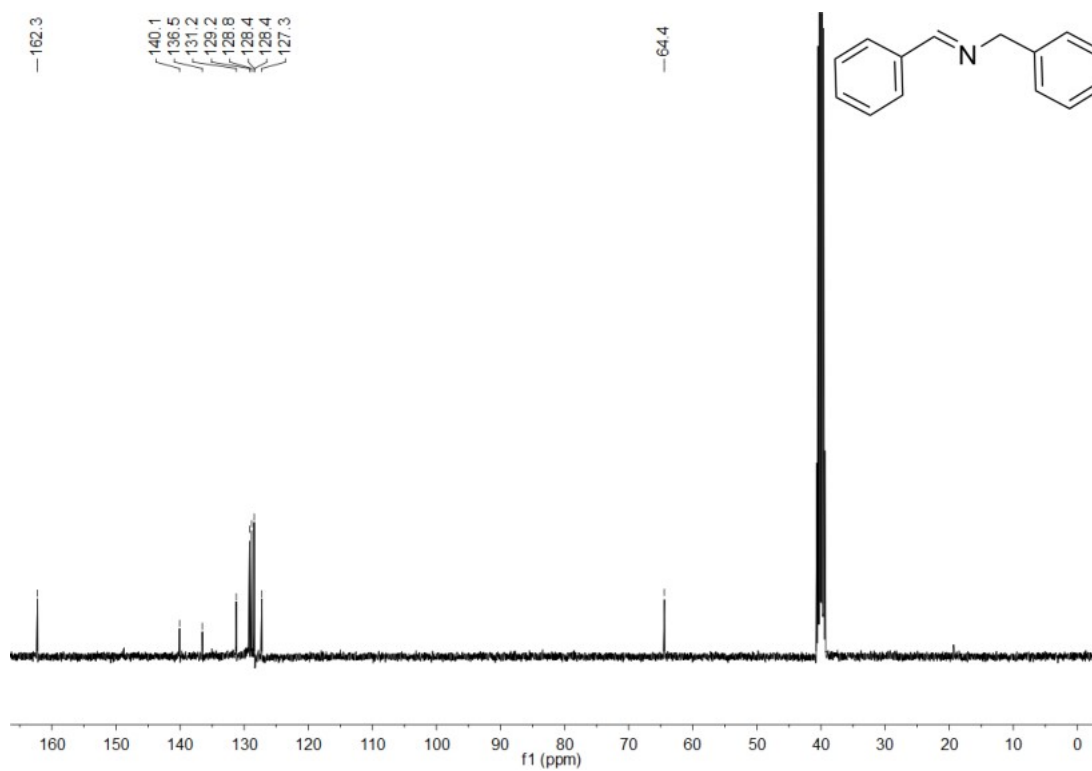

Figure S3.4  $^{13}\text{C}$  NMR of spectra of  $[\text{Be}_2\text{A}][\text{H}]$

### Section S3.3 $^1\text{H}$ NMR, $^{13}\text{C}$ NMR of $[\text{Be}_2\text{A}][\text{F}]$

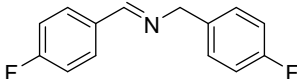  $[\text{Be}_2\text{A}][\text{F}]((\text{E})\text{-N-(4-fluorobenzyl)-1-(4-fluorophenyl)methanimine):$   $^1\text{H}$  NMR (400 MHz,  $\text{DMSO-}d_6$ ):  $\delta$  8.50 (s, 1H), 7.85 (q,  $J=5.6$  Hz, 2H), 7.37 (q,  $J=6.0$  Hz, 2H), 7.30 (t,  $J=8.0$  Hz, 2H), 7.17 (t,  $J=8.0$  Hz, 2H), 4.75 (s, 2H).  $^{13}\text{C}$  NMR (100 MHz,  $\text{DMSO-}d_6$ ):  $\delta$  161.1, 130.7, 130.63, 130.2, 130.2, 116.3, 116.1, 115.6, 115.4, 63.4.

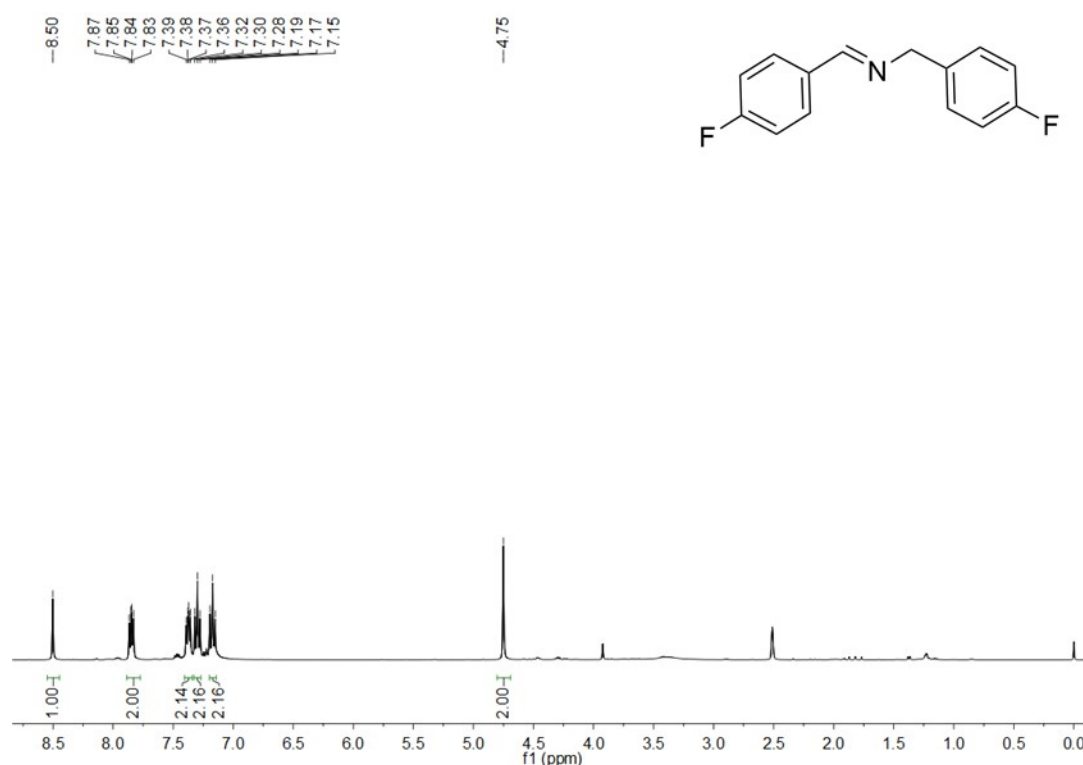

Figure S3.5  $^1\text{H}$  NMR of spectra of  $[\text{Be}_2\text{A}][\text{F}]$

Figure S3.6  $^{13}\text{C}$  NMR of spectra of  $[\text{Be}_2\text{A}][\text{F}]$

### Section S3.4 $^1\text{H}$ NMR, $^{13}\text{C}$ NMR of $[\text{Be}_2\text{A}][\text{Cl}]$

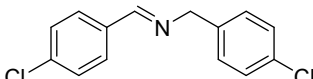  $[\text{Be}_2\text{A}][\text{Cl}]((\text{E})\text{-N-(4-chlorobenzyl)-1-(4-chlorophenyl)methanimine):$   $^1\text{H}$  NMR (400 MHz,  $\text{DMSO-}d_6$ ):  $\delta$  8.44 (s, 1H), 7.74 (d,  $J=8.0$  Hz, 2H), 7.46 (d,  $J=8.0$  Hz, 2H), 7.32

(q, 8.0 Hz, 4H), 4.70 (s, 2H).  $^{13}\text{C}$  NMR (100 MHz,  $\text{DMSO-}d_6$ ):  $\delta$  161.5, 139.0, 135.9, 135.3, 131.9, 130.2, 130.1, 129.3, 128.8, 63.3.

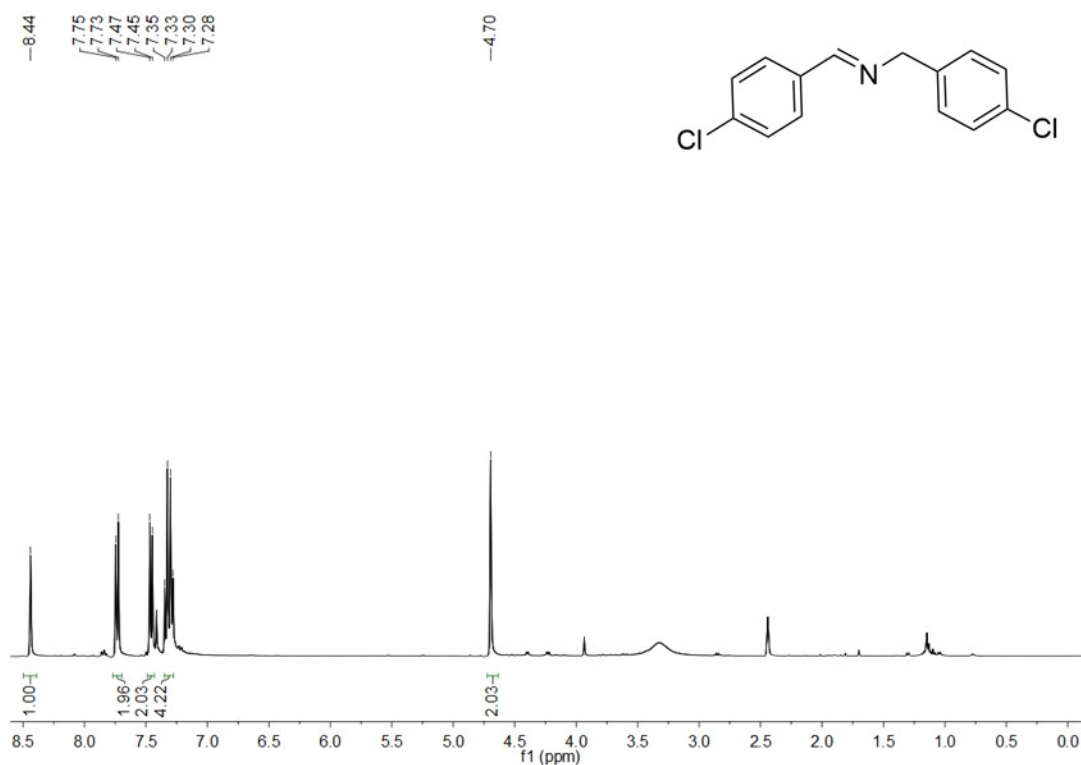

**Figure S3.7**  $^1\text{H}$  NMR of spectra of  $[\text{Be}_2\text{A}][\text{Cl}]$

**Figure S3.8**  $^{13}\text{C}$  NMR of spectra of  $[\text{Be}_2\text{A}][\text{Cl}]$

**Section S3.5**  $^1\text{H}$  NMR,  $^{13}\text{C}$  NMR of  $[\text{Th}_2\text{A}][\text{H}]$

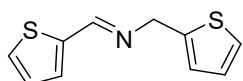

**$[\text{Th}_2\text{A}][\text{H}]$ ((E)-1-(thiophen-2-yl)-N-(thiophen-2-ylmethyl)methanimine):**  $^1\text{H}$

NMR (400 MHz,  $\text{DMSO-}d_6$ ):  $\delta$  8.59 (s, 1H), 7.70 (d,  $J=4.0$  Hz, 1H), 7.52 (d,  $J=4.0$  Hz, 1H), 7.43 (t,  $J=4.0$  Hz, 1H), 7.16 (t,  $J=4.0$  Hz, 1H), 7.01 (d,  $J=4.0$  Hz, 2H), 4.89 (s, 2H).  $^{13}\text{C}$  NMR (100 MHz,  $\text{DMSO-}d_6$ ):  $\delta$  156.3, 142.8, 142.4, 132.4, 130.4, 128.3, 127.4, 125.6, 125.5, 58.2.

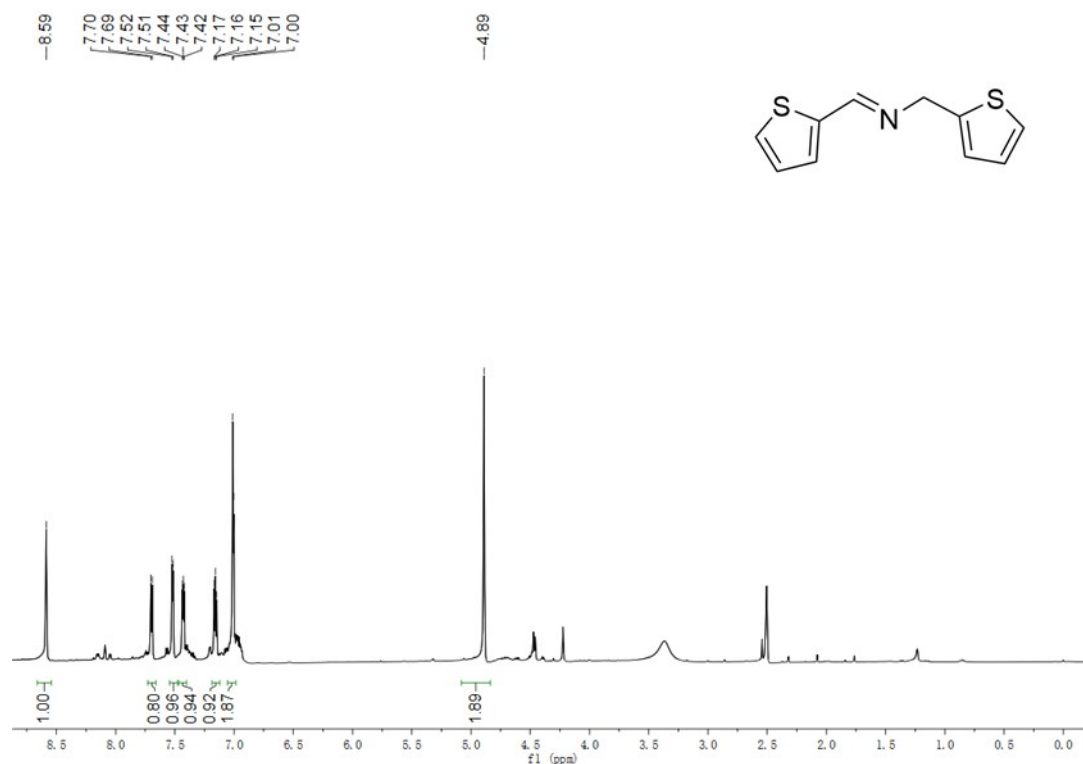

**Figure S3.9** <sup>1</sup>H NMR of spectra of [Th<sub>2</sub>A][H]

**Figure S3.10** <sup>13</sup>C NMR of spectra of [Th<sub>2</sub>A][H]

## References

1. Y. Chai, L. Zhang, Q. Liu, F. Yang and W.-L. Dai, Insights into the Relationship of the Hetero-junction Structure and Excellent Activity: Photo-oxidative Coupling of Benzyl-amine on CeO<sub>2</sub>-rod/g-C<sub>3</sub>N<sub>4</sub> Hybrid under Mild Reaction Conditions *ACS Sustainable Chemistry & Engineering*, 2018, **6**, 10526-10535.
2. L. Wu, Z. Lu, J. Liao, et al Ibupoto and K. Lv, Facile Fabrication of Ternary NiTiFe-LDH Ultrathin Nanosheets for Efficient Conversion of Amines into Imines under Visible Light, *Chemosphere*, 2024, **352**.
3. J. Shi, J. Zhang, T. Liang, D. Tan, et al. Bipyridyl-Containing Cadmium-Organic Frameworks for Efficient Photocatalytic Oxidation of Benzylamine, *ACS Applied Materials & Interfaces*, 2019, **11**, 30953-30958.
4. G. Che, W. Yang, C. Wang et al., Efficient Photocatalytic Oxidative Coupling of Benzylamine over Uranyl-Organic Frameworks *Inorganic Chemistry*, 2022, **61**, 12301-12307.
5. C. Chu, Y. Qin, C. Ni and J. Zou, Halogenated Benzothiadiazole-based Conjugated Polymers as Efficient Photocatalysts for Dye Degradation and Oxidative Coupling of Benzylamines *Chinese Chemical Letters*, 2022, **33**, 2736-2740.
